# Supplementary material
Source: Elsevier journal article supplement (https://www.sciencedirect.com/science/article/pii/S2530064420300213)
Supplement: mmc2 [file S2530064420300213:mmc2.docx]

**Supplementary material 2**

**Population Viability as a tool for Giant Anteater Conservation**

Arnaud Desbiez1,*, Alessandra Bertassoni2,3, Kathy Traylor-Holzer4

Table 4. Sensitivity analysis results for different scenarios regarding Vortex parameters of giant anteater (*Myrmecophaga tridactyla*) population viability analysis. * Scenarios on Figure 1 and 1 Following Diniz & Brito (2013).

|  | stoch-r | SD(r) | PE | N-all | SD(Nall) | GeneDiv | SD(GD) | MeanTE |
| --- | --- | --- | --- | --- | --- | --- | --- | --- |
| Best Guess Biological potential without catastrophe | 0.0640 | 0.0434 | 0 | 298.73 | 5.23 | 0.9574 | 0.0067 | 0 |
| BG including catastrophe (BGCat) | 0.0496 | 0.1066 | 0 | 272.55 | 54.19 | 0.9524 | 0.0104 | 0 |
| BGCat_Female first Age of Reproduction Low (F_A1RLow)* | 0.0707 | 0.1064 | 0 | 283.45 | 40.62 | 0.9506 | 0.0091 | 0 |
| BGCat_Female first age of Reproduction High (F_1RHigh)* | 0.0320 | 0.1068 | 0.002 | 260.62 | 65.64 | 0.9531 | 0.0162 | 99.0 |
| BGCat_Male first age of Reproduction High (M1Rhigh)* | 0.0503 | 0.1062 | 0 | 274.02 | 52.74 | 0.9539 | 0.0284 | 0 |
| BGCat_Female Last Age of Reproduction Low (F_LastR_low)* | 0.0184 | 0.1069 | 0.016 | 220.46 | 91.77 | 0.9385 | 0.0323 | 88.3 |
| BGCat_Female Last Age of Reproduction High (F_LastR_high)* | 0.0522 | 0.1072 | 0 | 274.86 | 51.97 | 0.9519 | 0.0146 | 0 |
| BGCat_Male Last Reproduction Low (M_LastR_low)* | 0.0487 | 0.1062 | 0 | 273.46 | 53.25 | 0.9467 | 0.0139 | 0 |
| BGCat_Percentage of female breeding low (%Flow)* | 0.0222 | 0.1088 | 0.006 | 237.69 | 80.59 | 0.9480 | 0.0241 | 74.8 |
| BGCat_Percentage of females breeding high (%FB high)* | 0.0731 | 0.1066 | 0 | 281.94 | 43.68 | 0.9523 | 0.0092 | 0 |
| BGCat_Sex Ratio 75¹ | -0.0437 | 0.1332 | 0.838 | 2.37 | 7.05 | 0.7340 | 0.1549 | 74.7 |
| BGCat_Juvenile mortality low (Mort0-1Low)* | 0.0638 | 0.1066 | 0.001 | 279.91 | 47.16 | 0.9526 | 0.0104 | 90.0 |
| BGCat_Juvenile mortality high (Mort0-1 High)* | -0.0216 | 0.1200 | 0.179 | 59.19 | 67.49 | 0.8742 | 0.1094 | 83.7 |
| BGCat_Mortality of subadults Low (MortSubADlow)* | 0.0539 | 0.1086 | 0 | 272.09 | 54.11 | 0.9526 | 0.0110 | 0 |
| BGCat_Mortality of subadults high (MortSubHigh)* | 0.0383 | 0.1100 | 0 | 258.86 | 65.40 | 0.9495 | 0.0165 | 0 |
| BGCat_Mortality of Adults low (MortAD Low)* | 0.0732 | 0.1048 | 0 | 283.69 | 42.16 | 0.9548 | 0.0086 | 0 |
| BGCat_Mortality of Adults high (MortAD High)* | 0.0024 | 0.1123 | 0.048 | 161.48 | 101.73 | 0.9224 | 0.0703 | 84.1 |
